# Supplementary material
Source: ML conference proceedings conference paper supplement (https://proceedings.neurips.cc/paper_files/paper/2011/hash/182be0c5cdcd5072bb1864cdee4d3d6e-Abstract.html)
Supplement: Supplementary file [file 182be0c5cdcd5072bb1864cdee4d3d6e-Supplemental.zip]

**Unsolved Problem 1:** No fully automatic solution today is capable of detecting and tracking both the people and the basketball.

**Unsolved Problem 2:** Building large video data sets is inefficient because frame-by-frame hand labeling is slow, costly, and tedious.

Motivations

- What is the best division of labor for crowdsource video labeling?
- What are the tradeoffs between automation and manual labeling?
- Given a fixed budget, what is the best accuracy we can achieve?

Contributions

- A set of “best-practices” for crowdsourced video annotation.
- In contrast to [3], can interpolate nonlinear paths w/o much effort.
- Expanding [2] to analyze tradeoffs between human and CPU cost.
- Ability to build *massive* video data sets under a budget.
- A reusable, open source video annotation platform for affordable, research video labeling.

Mechanical Turk

- Mechanical Turk: online, monetized, crowd-sourced marketplace.
- Ideal for tasks that are hard for computers, but trivial for humans.
- Workers complete *Human Intelligence Tasks* and we get results.

The “Turk Philosophy”

- Suggests completely replacing automation with human effort.
- For *Images*: annotate every object (highly successful). [1]
- For *Video*: hand label every frame (highly inefficient).
- Given the redundant yet dynamic nature of video, we need an approach that combines the computational power of the CPU with the superior vision capability of humans.

References

[1] A. Sorokin and D. Forsyth. Utility data annotation with amazon mechanical turk. *Urbana*, 51:61820, 2008.

[2] S. Vijayanarasimhan and K. Grauman. Whats It Going to Cost You?: Predicting Effort vs. Informativeness for Multi-Label Image Annotations. CVPR, 2009.

[3] J. Yuen, B. Russell, C. Liu, and A. Torralba. LabelMe video: Building a Video Database with Human Annotations. 2009.

Interactive Video Player

- Browser video player that guides a worker to label an entity.
- First, instructs user to draw a box around an item of interest.
- User then adjusts the box when video pauses on the next key frame.

- Extracted into frames: removed artifacts from Flash video codec.
- Carefully manage frame caching to reduce bandwidth.
- Wider participation across platforms without Flash support.

Quality Assurance

- No quality guarantee. Workers motivated to finish quickly.
- Experiments indicate **35%** of labels were poor (see below).
- Identify degenerates through hand validation, statistical overlap, heuristic technique, or user agent identification string.

Dense Labeling Protocol

- Worker instructed to annotate an unlabeled entity.
- If initial frame fully labeled, advance to next key frame.
- Instructs worker to label again — repeat (2) if still none.
- If worker can track and work is not degenerate, add to video.
- Else, if no new objects are discovered, vote to finish.
- After enough votes, server stops spawning HITs for the video.

Video Server Cloud

- Server written in Python 2.6 and Cython. Client in JavaScript.
- Entirely open source. Can deploy to clouds without license fees.
- A year’s worth of experiments. Workers produced quality annotations throughout the 210,000 frame basketball game.

Linear Interpolation

- The simplest tracking approach is linear interpolation:
$$b_t^{lin} = \left(\frac{t}{T}\right)b_0 + \left(\frac{T-t}{T}\right)b_T \quad \text{for } 0 \leq t \leq T$$
- But, objects do not necessarily move linearly and can be chaotic.

Discriminative Object Templates

- Extract both HOG and RGB histogram from foregrounds and backgrounds from the annotated frames:

$$\phi_n(b_n) = \begin{bmatrix} HOG \\ RGB \end{bmatrix} \quad y_n \in \{-1, 1\}$$

- Learn a SVM weight vector,  $w$ , that minimizes a linear loss:

$$w^* = \operatorname{argmin}_w \frac{1}{2} w \cdot w + C \sum_n^N \max(0, 1 - y_n w \cdot \phi_n(b_n))$$

- Data is very complex. Simpler templates perform poorly.

Can you spot all the difficult objects?

Constrained Tracking

- Calculate a least cost path between constrained endpoints:

$$\operatorname{argmin}_{b_{1:T}} \sum_{t=1}^T U_t(b_t) + P(b_t, b_{t-1})$$

- Local cost is SVM score plus linear deviation, but truncated:

$$U_t(b_t) = \min \left( -w \cdot \phi_t(b_t) + \alpha_1 ||b_t - b_t^{lin}||^2, \alpha_2 \right)$$

- Pairwise cost ensures path is smooth and does not teleport:

$$P(b_t, b_{t-1}) = \alpha_3 ||b_t - b_{t-1}||^2$$

- Dynamic programming efficiently solves the recursion:

$$\begin{aligned} cost_0(b_0) &= U_0(b_0) \\ cost_t(b_t) &= U_t(b_t) + \min_{b_{t-1}} cost_{t-1}(b_{t-1}) + P(b_t, b_{t-1}) \end{aligned}$$
