# Supplementary material
Source: ML conference proceedings conference paper supplement (https://proceedings.neurips.cc/paper_files/paper/2011/hash/182be0c5cdcd5072bb1864cdee4d3d6e-Abstract.html)

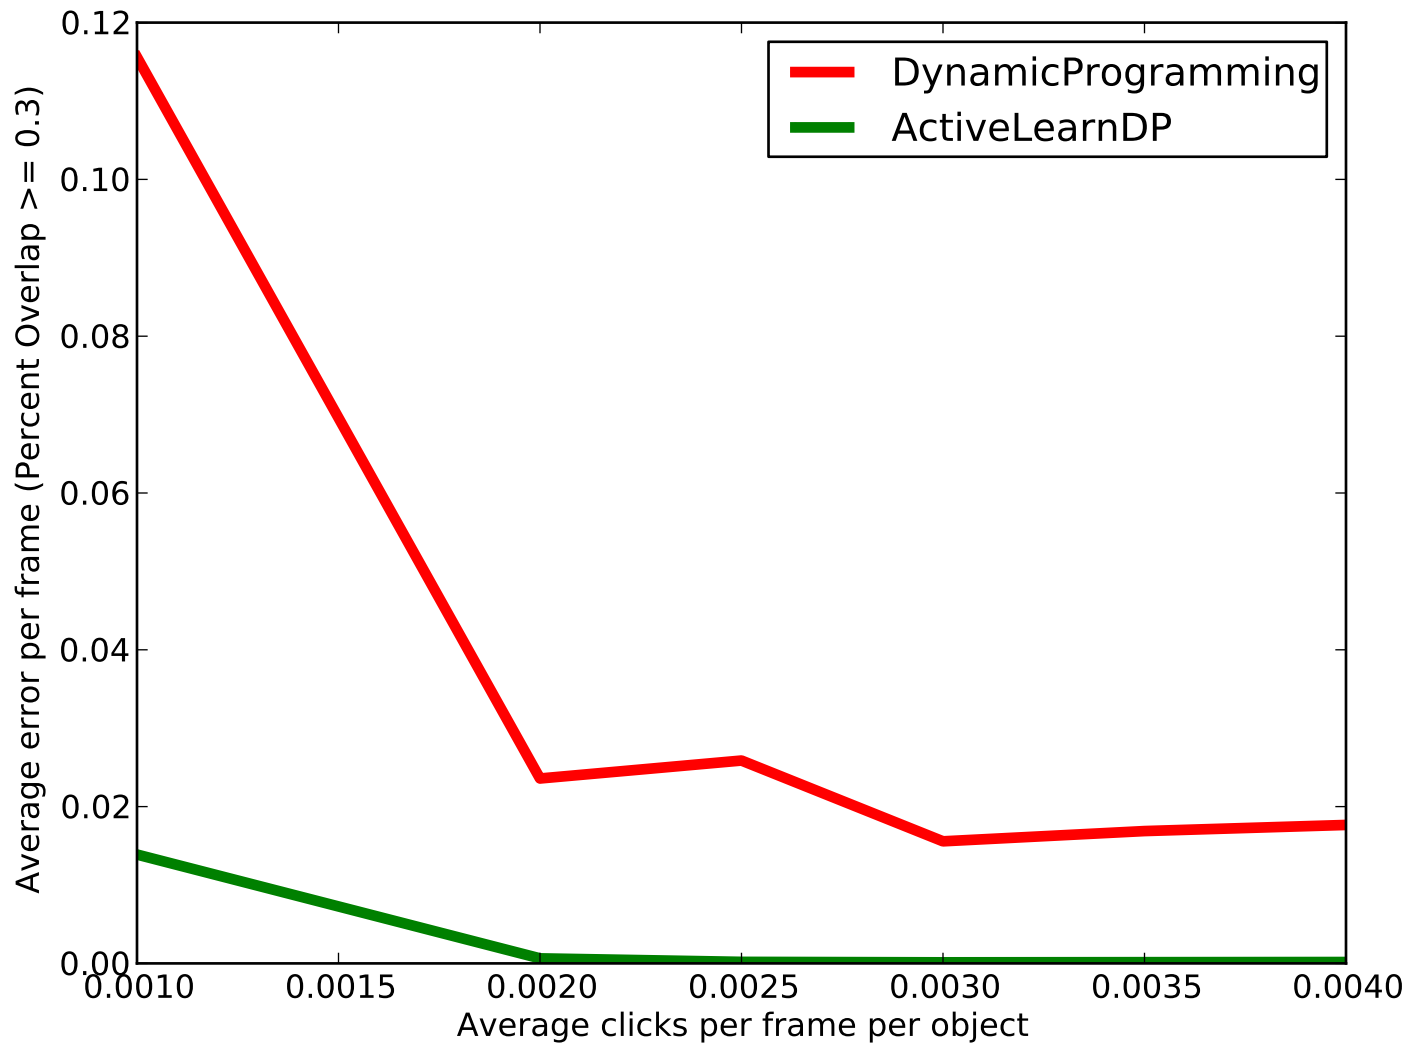

Supplement: Supplementary file [file 182be0c5cdcd5072bb1864cdee4d3d6e-Supplemental.zip]
